# Supplementary material for: A dual-responsive ratiometric fluorescent probe for the detection of hypochlorite and hydrazine in environmental samples, live cells, and plant tissues
Source: Royal Society of Chemistry journal article supplement (doi:10.1039/d5ay00153f), 2025-01-01
Supplement: d5ay00153f3.pdf [file d5ay00153f3.pdf]

## **A Dual-Responsive Ratiometric Fluorescent Probe for the Detection of Hypochlorite and Hydrazine in Environmental Samples, Live Cells, and Plant Tissues**

Dipanjana Banik<sup>a</sup>, Shilpita Banerjee<sup>a</sup>, Satyajit Halder<sup>b</sup>, Rajdeep Ganguly<sup>c</sup>, Anirban Karak<sup>a</sup>,  
Pintu Ghosh<sup>a</sup>, Kuladip Jana<sup>b</sup>, Ajit Kumar Mahapatra<sup>a\*</sup>

<sup>a</sup>Molecular Sensor and Supramolecular Chemistry Laboratory, Department of Chemistry,  
Indian Institute of Engineering Science and Technology, Shibpur, Howrah-711103, West  
Bengal, India.

<sup>b</sup>Division of Molecular Medicine, Bose Institute, P 1/12, CIT Scheme VIIM, Kolkata 700054,  
India.

<sup>c</sup>Centre for Healthcare Science and Technology, Indian Institute of Engineering Science and  
Technology, Shibpur, Howrah-711103, West Bengal, India.

\*Author to whom correspondence should be addressed; electronic mail:

akmahapatra@chem.iiests.ac.in; Tel.: +91 – 9434508013

## Contents

| Description                                                                                                                                                        | Page    |
|--------------------------------------------------------------------------------------------------------------------------------------------------------------------|---------|
| 1. Experimental section.....                                                                                                                                       | S3-S6   |
| 2. Table S1 Crystal Data and Structure Refinement Parameters of the probe <b>PIID</b> .....                                                                        | S7      |
| 3. Plot of absorbance ratio change of <b>PIID</b> against different concentrations of $\text{ClO}^-$ .....                                                         | S8      |
| 4. Plot of absorbance ratio change of <b>PIID</b> against different concentrations of $\text{N}_2\text{H}_4$ .....                                                 | S8      |
| 5. Emission spectra of <b>PIB</b> .....                                                                                                                            | S9      |
| 6. Plot of fluorescence change of <b>PIID</b> against different concentrations of $\text{ClO}^-$ .....                                                             | S9      |
| 7. Plot of fluorescence change of <b>PIID</b> against different concentrations of Hydrazine.....                                                                   | S10     |
| 8. Fluorescence linear fit graph to determine the detection limit for hydrazine.....                                                                               | S10     |
| 9. Calculation of fluorescence quantum yield of <b>PIID</b> in the presence and absence of $\text{ClO}^-$ and $\text{N}_2\text{H}_4$ .....                         | S10-S11 |
| 10. Selectivity study.....                                                                                                                                         | S11     |
| 11. Time-dependent emission ratios change with time of the reaction of <b>PIID</b> with $\text{N}_2\text{H}_4$ .....                                               | S11     |
| 12. Determination of rate constant ( $k_{\text{obs}}$ ) of the reaction of <b>PIID</b> with $\text{N}_2\text{H}_4$ .....                                           | S12     |
| 13. Investigation of the reaction mechanism by using HRMS spectra.....                                                                                             | S12-S13 |
| 14. Table S2 The main vertical orbital transition of the Probe <b>PIID</b> and the resulting compounds <b>PIB</b> and <b>PIBH</b> calculated by TD-DFT method..... | S13     |
| 15. MTT assay.....                                                                                                                                                 | S14     |
| 16. Table S3 Environmental water sample study for $\text{ClO}^-$ detection .....                                                                                   | S14     |
| 17. Table S4 Environmental water sample study for $\text{N}_2\text{H}_4$ detection .....                                                                           | S14     |
| 18. Fluorescence spectra of probe for commercial sample.....                                                                                                       | S15     |
| 19. $^1\text{H}$ -NMR and $^{13}\text{C}$ -NMR spectrum of <b>PIB</b> and <b>PIID</b> .....                                                                        | S15-S17 |
| 20. IR spectra of probe <b>PIID</b> .....                                                                                                                          | S17     |
| 21. ESI-MS Spectra of <b>PIB</b> and <b>PIID</b> .....                                                                                                             | S18     |
| 22. Comparison Table S5 between reported $\text{ClO}^-$ probes with our probe <b>PIID</b> .....                                                                    | S19     |
| 23. Comparison Table S5 between reported $\text{N}_2\text{H}_4$ probes with                                                                                        |         |

|                             |     |
|-----------------------------|-----|
| our probe <b>PIID</b> ..... | S20 |
| <b>24. References</b> ..... | S21 |

## 1. Experimental section

### Materials and instrumentation

The chemicals of Sigma-Aldrich company were used directly for synthesis purposes. Commercially supplied analytical grade solvents were used for all experiments. 100-200 mesh Silica gel (Spectrochem Pvt. Ltd. Mumbai, India) was used in column chromatography to purify products, and Merck silica gel 60 F<sub>254</sub> plates were used for thin layer chromatography (TLC). UV-vis spectra were done by using a Shimadzu UV-1800 UV-vis spectrophotometer. A fluorescence spectrophotometer (Model 1057, Fluorolog, Horiba Scientific, USA) was used for recording Fluorescence spectra. <sup>1</sup>H and <sup>13</sup>C NMR spectra were performed using Bruker Avance 400 MHz instrument where DMSO-d<sub>6</sub> was used as solvent and TMS as an internal standard. Mass spectra were carried out using a Waters Q-TOF YA 263 mass spectrometer.

### The general method of UV-vis and fluorescence titration

Spectral measurements were done by preparing a stock solution of the probe **PIID** in a THF/H<sub>2</sub>O solution (3:7 and 4:6 v/v; 10 mM PBS buffer, pH 7.4) by filling a quartz optical cell having a 1cm optical path length was filled with 2 ml probe solution (10<sup>-5</sup>M) and both the titration experiments were done by continuous addition of a 10 μM analyte stock solution (10<sup>-4</sup>M) to this probe solution by using a micropipette.

### Cell line study

To conduct our investigation, we acquired the NKE human kidney epithelial cell line, MDA-MB 231 human breast cancer cell line, and RAW 264.7 macrophage cell line from the National Center for Cell Science (NCCS) in Pune, India. The cells were cultivated in T25 flasks using Dulbecco's Modified Eagle Medium (DMEM), meticulously supplemented with 10% fetal bovine serum (FBS), 1 mM sodium pyruvate, 2 mM L-glutamine, non-essential amino acids, and a comprehensive antibiotic mix comprising 100 U/mL penicillin, 100 mg/L streptomycin, and 50 mg/L gentamycin. To maintain cell viability and promote optimal growth conditions, the cultures were housed in a humidified incubator set at 37 °C with 5% CO<sub>2</sub>.

### Cytotoxicity assay

The cytotoxicity of the **PIID** probe was assessed via the MTT cell proliferation assay<sup>1</sup> on MDA-MB-231 breast cancer cells, NKE normal kidney epithelial cells, and RAW 264.7 macrophage cells. Cells were seeded in 96-well plates at a density of 1 × 10<sup>4</sup> cells per well and incubated for 24 hours to allow adherence. Subsequently, cells were treated with a range of **PIID** probe concentrations (0 μM, 10 μM,

20  $\mu$ M, 30  $\mu$ M, 40  $\mu$ M, 80  $\mu$ M, and 100  $\mu$ M) for a 24-hour exposure period. After treatment, the culture medium was removed, and cells were rinsed with 1x PBS. MTT solution at 0.5 mg/mL was added to each well, and cells were incubated for 4 hours. After incubation, cells were rinsed again with PBS, and the resulting formazan crystals were solubilized in DMSO. Absorbance was measured at 570 nm using a microplate reader. Cell viability was calculated as a percentage relative to untreated control cells.

### Exogenous and endogenous hypochlorite imaging

Fluorescence imaging was conducted on MDA-MB-231 cells to investigate the fluorescence properties of the **PIID** probe in response to hypochlorite (5  $\mu$ M and 10  $\mu$ M). Cells were cultured on coverslips for 24 hours at 37°C in a humidified atmosphere containing 5% CO<sub>2</sub>. The cells were then pretreated with hypochlorite at concentrations of 5  $\mu$ M and 10  $\mu$ M for 20 minutes. After washing with PBS, the cells were treated with 10  $\mu$ M of the **PIID** probe and incubated for 20 minutes. A final PBS wash was performed to remove any unbound **PIID**, and the cells were mounted on glass slides for imaging using an Olympus fluorescence microscope.

To further evaluate the in vivo hypochlorite sensing ability of **PIID**, RAW 264.7 macrophages were similarly cultured on coverslips for 24 hours at 37°C in a humidified environment with 5% CO<sub>2</sub>. The cells were pretreated with lipopolysaccharide (LPS) at 1  $\mu$ g/mL concentrations and 2  $\mu$ g/mL for 3 hours. After PBS washing, they were treated with 10  $\mu$ M of the **PIID** probe and incubated for 20 minutes. Following another PBS wash, the cells were mounted on glass slides and visualized using an Olympus fluorescence microscope.

Since NAC (N-acetyl cysteine) is known to reduce intracellular hypochlorite levels, in a separate experimental setup, RAW 264.7 cells pretreated with LPS (2  $\mu$ g/mL) + N-acetyl cysteine (NAC) were exposed to 10  $\mu$ M of the **PIID** to confirm the specificity of the **PIID** probe's fluorescence response to hypochlorite.

### Synthesis of the probe

#### Synthesis and characterization of 4-(1H-phenanthro[9,10-d] imidazol-2-yl) benzaldehyde (PIB):

10 ml Acetic acid was added to a mixture of 9,10-phenanthroquinone (500 mg, 2.40 mmol) and terephthalaldehyde (966 mg, 7.20 mmol) followed by the addition of ammonium acetate (3.70 g, 48 mmol) and stirred for 2hr at 100°C. Then, the reaction mixture was cooled to room temperature, and the precipitate was filtered through filter paper. After that, it was washed with acetate acid, dilute sodium hydrogen carbonate solution, and water successively. Finally, after vacuum drying, the precipitate was purified by column chromatography on silica gel (eluent: acetone) to afford yellow crystalline solid **PIB** (588 mg, yield~75.8%)

**<sup>1</sup>H NMR (400 MHz, DMSO):**  $\delta$  13.73 (s, 1H), 10.10 (s, 1H), 8.87 (dd,  $J$  = 14.8, 8.3 Hz, 2H), 8.60 (dd,  $J$  = 15.1, 7.5 Hz, 2H), 8.53 (d,  $J$  = 8.3 Hz, 2H), 8.14 (d,  $J$  = 8.4 Hz, 2H), 7.77 (dt,  $J$  = 14.9, 7.3 Hz, 2H), 7.66 (dt,  $J$  = 8.4, 4.3 Hz, 2H).

**<sup>13</sup>C NMR (101 MHz, DMSO):** δ 193.06 (s), 148.16 (s), 137.89 (s), 136.52 (s), 135.90 (s), 130.70 (s), 128.83 (s), 128.54 (s), 128.21 (s), 127.82 (s), 127.70 (s), 127.30 (s), 126.92 (s), 126.32 (s), 125.99 (s), 124.66 (s), 124.30 (s), 122.73 (s), 122.69 (s), 122.41 (s).

**HRMS (ESI): *m/z* (%):** 323.1175 [**PIB** + H]<sup>+</sup> (Calc. for C<sub>22</sub>H<sub>15</sub>N<sub>2</sub>O<sup>+</sup>: 323.1178)

**Synthesis and characterization of 2-(4-(1H-phenanthro[9,10-d] imidazol-2-yl) benzyldiene)-1H-indene-1,3(2H)-dione (PIID):**

7 ml of anhydrous ethanol was added to a mixture of **PIB** (300 mg, 0.93 mmol) and 1,3-indanedione (164 mg, 1.12 mmol) in a two-neck round bottom flask under a nitrogen atmosphere and blended for 15 minutes. Then, two drops of piperidine were added and refluxed overnight. Afterward, the reaction mixture was cooled to room temperature, filtered, and washed with cold ethanol. Finally, the precipitate was subjected to column chromatography using 1% ethyl acetate in DCM to obtain a floppy red solid of **PIID** as the pure product (185 mg, yield~ 44.15%).

**IR (cm<sup>-1</sup>):** 3330 (ν, N-H), 1716 (ν, C=O), 1667 (ν, C=O), 1578 (ν, C=N).

**<sup>1</sup>H NMR (400 MHz, DMSO):** δ 13.70 (s, 1H), 8.87 (dd, *J* = 14.5, 8.3 Hz, 2H), 8.75 (d, *J* = 8.5 Hz, 2H), 8.60 (dd, *J* = 18.7, 7.1 Hz, 2H), 8.48 (d, *J* = 8.5 Hz, 2H), 8.07 – 7.94 (m, 4H), 7.91 (s, 1H), 7.83 – 7.72 (m, 2H), 7.67 (q, *J* = 7.2 Hz, 2H).

**<sup>13</sup>C NMR (101 MHz, DMSO):** δ 189.17 (s), 189.15 (s), 148.39 (s), 144.88 (s), 142.50 (s), 140.01 (s), 138.34 (s), 138.04 (s), 136.54 (s), 136.50 (s), 136.36 (s), 136.34 (s), 135.17 (s), 135.10 (s), 134.50 (s), 133.68 (s), 133.67 (s), 133.28 (s), 129.88 (s), 129.83 (s), 128.56 (s), 127.83 (s), 127.77 (s), 126.44 (s), 123.67 (s), 123.56 (s), 122.68 (s).

**HRMS (ESI): *m/z* (%):** 451.1439 [**PIID** + H]<sup>+</sup>. (Calc. for C<sub>31</sub>H<sub>19</sub>N<sub>2</sub>O<sub>2</sub><sup>+</sup>: 451.1441)

**Sources of RONS:**

H<sub>2</sub>O<sub>2</sub>: It was sourced commercially. The concentration was estimated using KMnO<sub>4</sub> titration and then used directly.

O<sub>2</sub><sup>•-</sup>: It was generated by adding KO<sub>2</sub> to dry DMSO and vigorously stirring for 10 minutes.

<sup>1</sup>O<sub>2</sub>: It was produced in situ by adding a hypochlorite stock solution (50 mM in H<sub>2</sub>O) to a solution with a large excess of H<sub>2</sub>O<sub>2</sub>.

NO: It was obtained from sodium nitroprusside solution, which is commercially available.

ClO<sup>-</sup>: It was obtained from commercially available sodium hypochlorite.

ONOO<sup>-</sup>: Peroxynitrite was prepared by mixing sodium nitrite (1.2 M), hydrogen peroxide (1.4 M), and HCl (1.2 M) in an ice bath, followed by the addition of NaOH solution (3 M). Excess hydrogen peroxide was removed by passing the solution through a manganese dioxide column, and the required concentration was then adjusted accordingly.

$\cdot\text{OH}$ : It was generated using the Fenton process. Twenty milligrams of  $\text{FeCl}_2$  were added to 10 equivalents of  $\text{H}_2\text{O}_2$ , assuming the  $\cdot\text{OH}$  concentration to be equal to that of  $\text{Fe}^{2+}$ . The solution was then diluted to the required concentration.

### Crystal structure of the probe **PIID**

The structure of the probe **PIID** was characterized by X-ray diffraction analysis of its single crystal (Fig.S1), which was grown by slow evaporation in the solvent mixture of THF/Hexane at room temperature. The CCDC entry no. is **2355056** for our crystal structure obtained from the Cambridge Crystallographic Data Centre. **PIID** was crystallized in the Monoclinic crystal system, belonging to the P 2<sub>1</sub>/c space group. we got the hydrated form of the probe **PIID** as its single crystal contains three  $\text{H}_2\text{O}$  molecules. In crystal packing (Fig.S2), strong H- H- bonding interaction was found between  $\text{N2-H7}\cdots\text{O4}$ ,  $\text{N1}\cdots\text{H5A}$ , and  $\text{O5}\cdots\text{H4A}$ . Crystallographic parameter and structure refinement details are presented in Table S1.

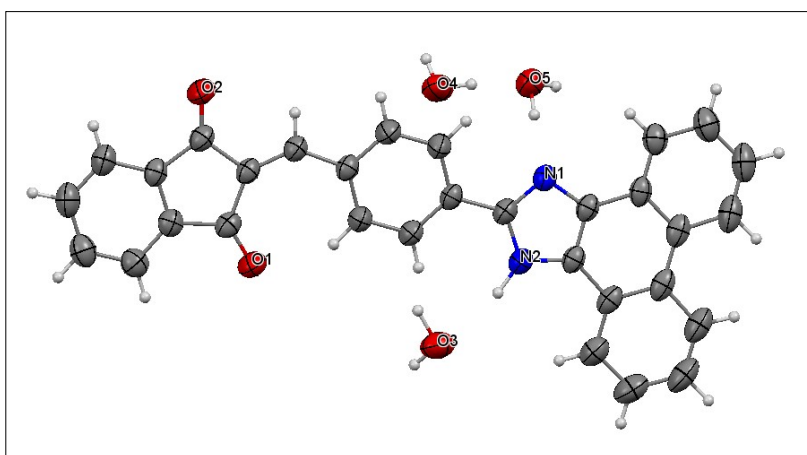

Fig. S1 ORTEP diagram of **PIID** with ellipsoid at 50% probability.

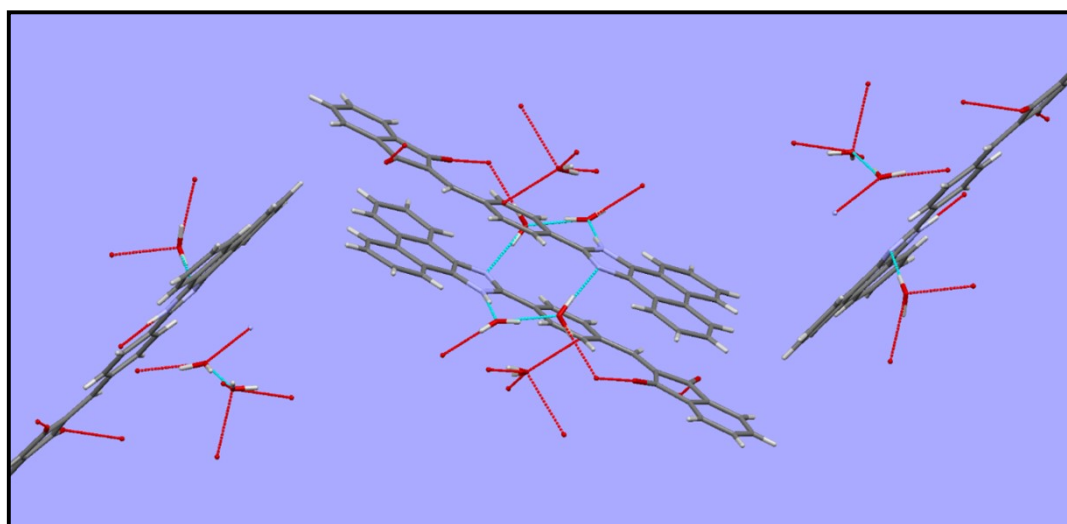

Fig. S2 H- bonding interaction was found between  $\text{N2-H7}\cdots\text{O4}$ ,  $\text{N1}\cdots\text{H5A}$ , and  $\text{O5}\cdots\text{H4A}$  in the crystal packing of the probe **PIID**.

## 2. Table S1 Crystal Data and Structure Refinement Parameters of the probe PIID

|                                                  |                                                                                     |
|--------------------------------------------------|-------------------------------------------------------------------------------------|
| Empirical formula                                | C <sub>31</sub> H <sub>18</sub> N <sub>2</sub> O <sub>2</sub> , 3(H <sub>2</sub> O) |
| Formula Weight                                   | 504.52                                                                              |
| Temperature (K)                                  | 250                                                                                 |
| Wavelength (Å)                                   | 0.71073                                                                             |
| Crystal system                                   | Monoclinic                                                                          |
| space group                                      | P 21/c                                                                              |
| a, b, c (Å)                                      | 8.5019(6), 31.998(2), 9.5689(6)                                                     |
| α, β, γ (°)                                      | 90, 109.195(2), 90                                                                  |
| Volume (Å <sup>3</sup> )                         | 2458.4(3)                                                                           |
| Z / Density (calc.) (Mg/m <sup>3</sup> )         | 4/ 1.363                                                                            |
| Absorption coefficient (mm <sup>-1</sup> )       | 0.093                                                                               |
| F (000)                                          | 1056.0                                                                              |
| θ range for data collection                      | 2.537 to 27.207                                                                     |
| Absorption correction                            | Multi-scan                                                                          |
| Max. and min. transmission                       | 0.953 and 0.944                                                                     |
| Refinement method                                | Full-matrix least-squares on F <sup>2</sup>                                         |
| Data/parameters                                  | 5448/ 371                                                                           |
| Goodness-of-fit on F <sup>2</sup>                | 0.950                                                                               |
| Final R indices [I > 2σ(I)]                      | R <sub>1</sub> = 0.0511, wR <sub>2</sub> = 0.1351                                   |
| R indices (all data)                             | R <sub>1</sub> = 0.1037, wR <sub>2</sub> = 0.1926                                   |
| Largest diff. peak and hole (e.Å <sup>-3</sup> ) | 0.165 and -0.194                                                                    |

$R_1 = \sum ||F_o| - |F_c|| / \sum |F_o|$ ,  $wR_2 = [\sum \{(F_o^2 - F_c^2)^2\} / \sum \{w(F_o^2)^2\}]^{1/2} w = 1 / \{\sigma^2(F_o^2) + (aP)^2 + bP\}$ ,  $P = (F_o^2 + 2F_c^2) / 3$ , where,  $a = 0.1000$  and  $b = 1.0379$ .

### 3. Plot of absorbance ratio change of PIID against different concentrations of $\text{ClO}^-$

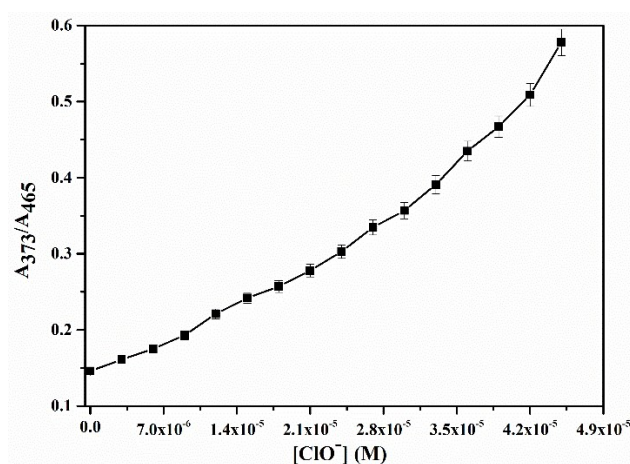

**Fig. S3** Change of the absorbance ratio ( $A_{373}/A_{465}$ ) of the probe PIID upon the addition of different concentrations of  $\text{ClO}^-$ . Error bars indicate standard deviations of three independent measurements.

### 4. Plot of absorbance ratio change of PIID against different concentrations of $\text{N}_2\text{H}_4$

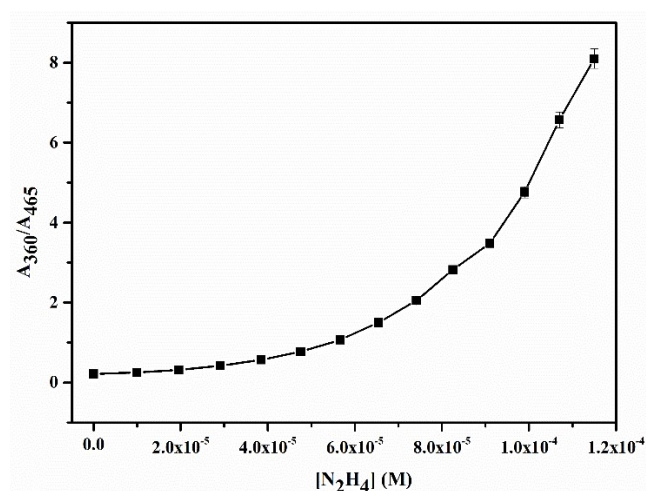

**Fig. S4** Change of the absorbance ratio ( $A_{360}/A_{465}$ ) of the probe PIID upon addition of different concentrations of  $\text{N}_2\text{H}_4$ . Error bars indicate standard deviations of three independent measurements.



## 5. Emission spectra of PIB

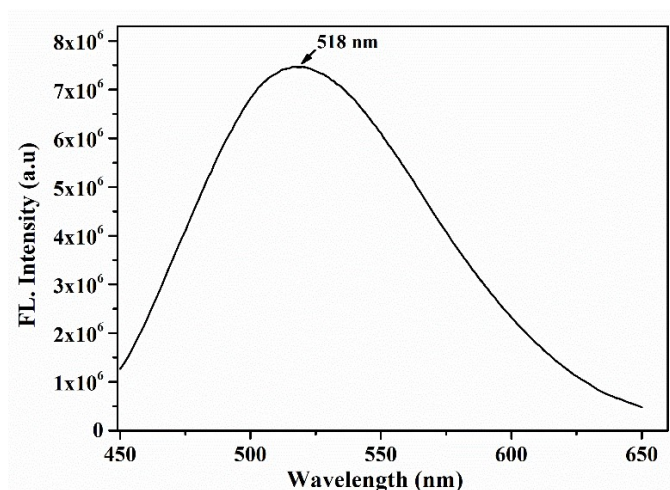

**Fig. S5.** Emission spectra of **PIB** ( $1 \times 10^{-5}$  M) in THF/H<sub>2</sub>O solution (3:7, v/v; 10 mM PBS buffer, pH 7.4) ( $\lambda_{\text{ex}} = 440$  nm,  $\lambda_{\text{em}} = 518$  nm).

## 6. Plot of fluorescence change of PIID against different concentrations of ClO<sup>-</sup>

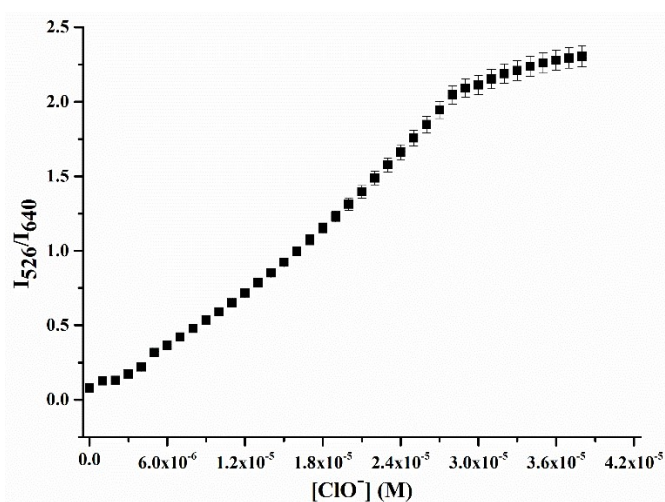

**Fig. S6** The plot of fluorescence intensity vs concentration of ClO<sup>-</sup>. Error bars indicate standard deviations of three independent measurements.

## 7. Plot of fluorescence change of PIID against different concentrations of hydrazine

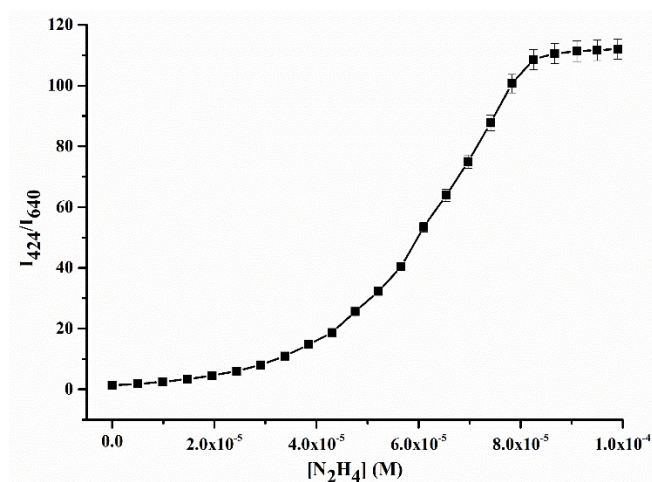

**Fig. S7** The plot of fluorescence intensity vs concentration of hydrazine. Error bars indicate standard deviations of three independent measurements.

## 8. Fluorescence linear fit graph to determine the detection limit for hydrazine

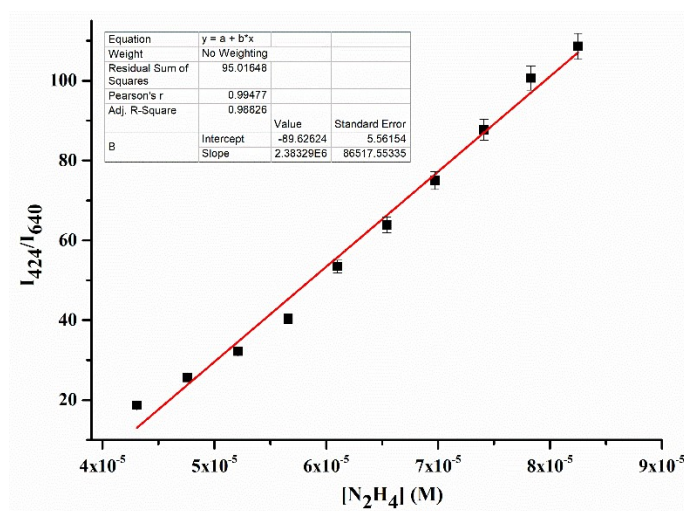

**Fig. S8** The fluorescence linear fit graph ( $R^2 = 0.98826$ ) within the concentration range 43 - 83  $\mu\text{M}$  of  $\text{N}_2\text{H}_4$  to determine the detection limit from the slope (K) obtained is  $2.38 \times 10^6$ . Error bars indicate standard deviations of three independent measurements.

## 9. Calculation of fluorescence quantum yield of PIID in the presence and absence of $\text{ClO}^-$ and $\text{N}_2\text{H}_4$

Here, the fluorescence quantum yield  $\Phi$  was calculated by using the following equation:

$$\Phi_x = \Phi_s (F_x / F_s) (A_s / A_x) (\eta_x^2 / \eta_s^2)$$

Where, X and S indicate the unknown and standard solution respectively,  $\Phi$  = quantum yield, F = Area under the emission curve, A = Absorbance at the excitation wavelength,  $\eta$  = Refractive index of solvent.

Here  $\Phi$  measurements were performed using Rhodamine B in ethanol as standard [ $\Phi = 0.70$ ].  $\eta_s = 1.361$  (for ethanol);  $\eta_x = 1.407$  (for THF)

In the absence of  $\text{ClO}^-$ , the calculated quantum yield ( $\Phi_x$ ) for probe **PIID** = 0.0897. where,  $\Phi_s = 0.70$ ,  $F_x = 1.58 \times 10^9$ ,  $F_s = 2.37 \times 10^8$ ,  $A_s = 0.0041$ ,  $A_x = 0.228$ .

In the presence of  $\text{ClO}^-$ , the calculated quantum yield ( $\Phi_x$ ) = 0.1150. Where,  $\Phi_s = 0.70$ ,  $F_x = 2.02 \times 10^9$ ,  $F_s = 2.37 \times 10^8$ ,  $A_s = 0.0041$ ,  $A_x = 0.228$ .

In the presence of  $\text{N}_2\text{H}_4$ , the quantum yield was calculated by using quinine sulfate in 0.5M  $\text{H}_2\text{SO}_4$  as standard [ $\Phi = 0.546$ ].  $\eta_s = 1.346$  (for 0.5M  $\text{H}_2\text{SO}_4$ );  $\eta_x = 1.407$  (for THF). The calculated quantum yield ( $\Phi_x$ ) = 0.10. Where,  $\Phi_s = 0.546$ ,  $F_x = 6.69 \times 10^8$ ,  $F_s = 1.2 \times 10^9$ ,  $A_s = 0.074$ ,  $A_x = 0.247$ .

## 10. Selectivity Study

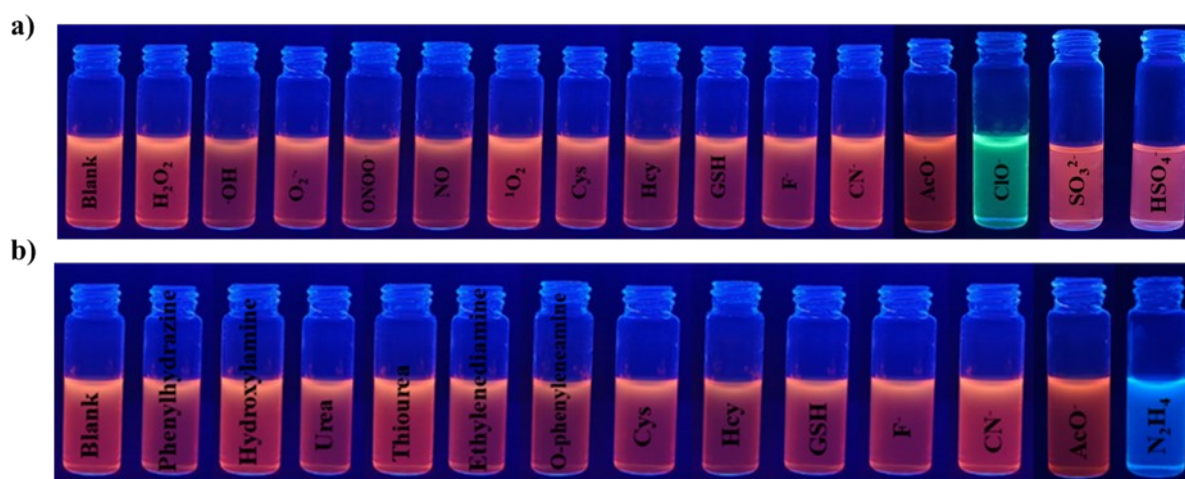

**Fig. S9** Fluorescence color change of the probe **PIID** a) in THF/ $\text{H}_2\text{O}$  solution (3:7, v/v; 10 mM PBS buffer, pH 7.4) b) in THF/ $\text{H}_2\text{O}$  solution (4:6, v/v; 10 mM PBS buffer, pH 7.4) upon the addition of various analytes under a UV lamp.

## 11. Time-dependent emission ratios change with time of the reaction of **PIID** with $\text{N}_2\text{H}_4$

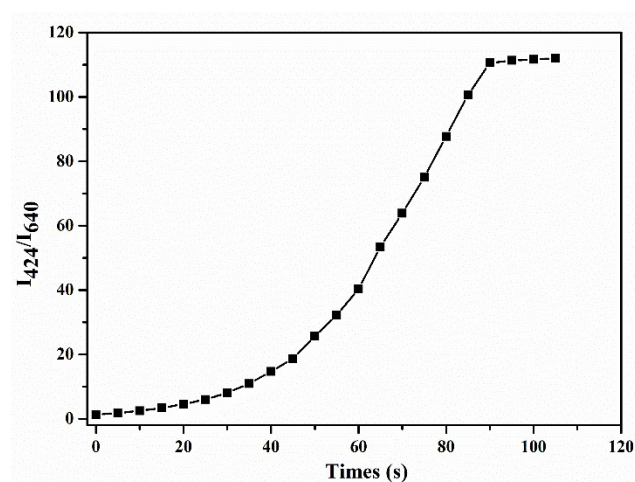

**Fig. S10** Time-dependent emission ratios of **PIID** in THF/ $\text{H}_2\text{O}$  solution (4:6, v/v; 10 mM PBS buffer, pH 7.4) in the presence of 99  $\mu\text{M}$  of  $\text{N}_2\text{H}_4$  respectively ( $\lambda_{\text{ex}} = 420 \text{ nm}$  &  $340 \text{ nm}$ ).

## 12. Determination of rate constant ( $k_{obs}$ ) of the reaction of PIID with $N_2H_4$

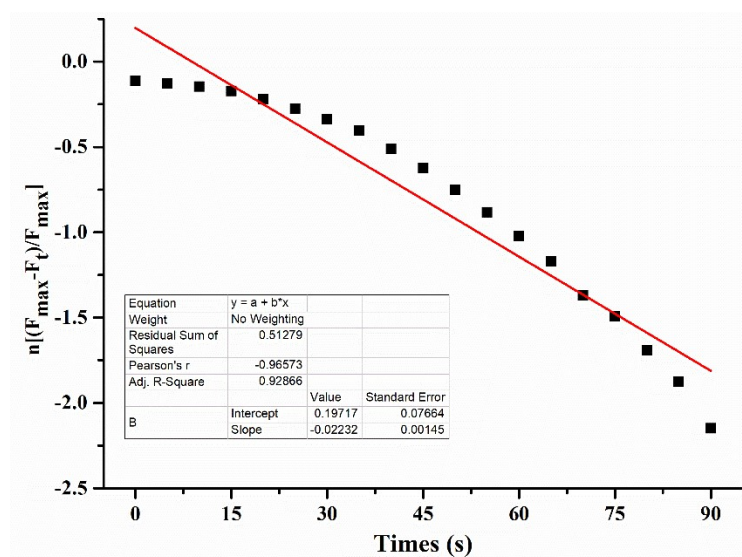

**Fig. S11** The kinetic plots to determine the pseudo-first-order rate constant ( $k_{obs}$ ) of the reaction of **PIID** with  $N_2H_4$  (99  $\mu M$ ) at room temperature in THF/ $H_2O$  solution (4:6, v/v; 10 mM PBS buffer, pH 7.4).

## 13. Investigation of the reaction mechanism by using HRMS spectra

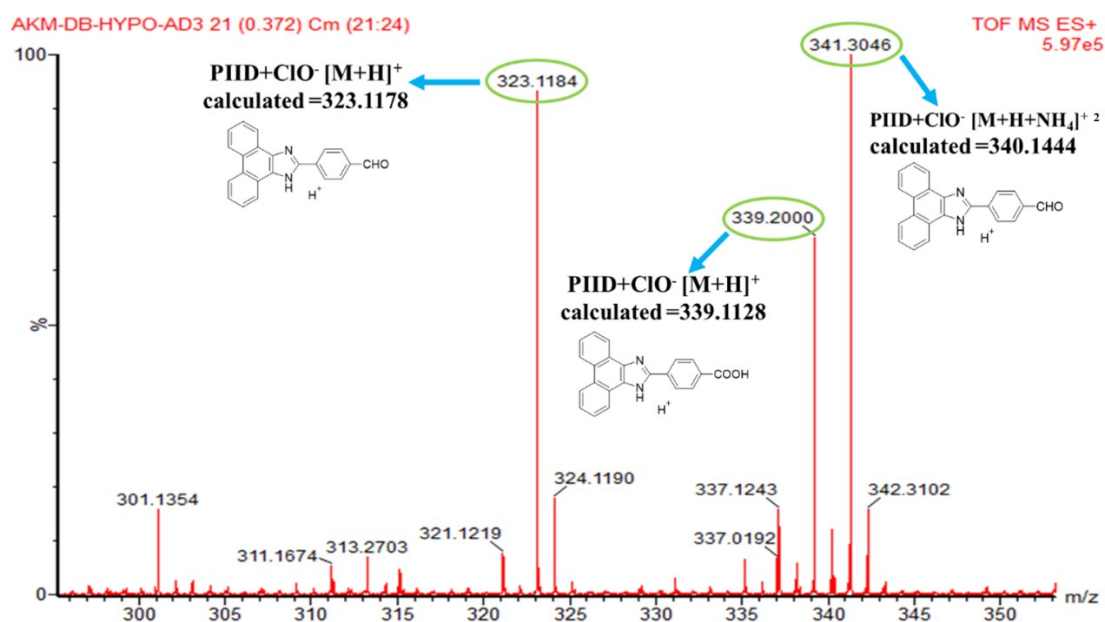

**Fig. S12** HRMS spectra were taken from the reaction mixture of the probe **PIID** and excess of  $ClO^-$ .

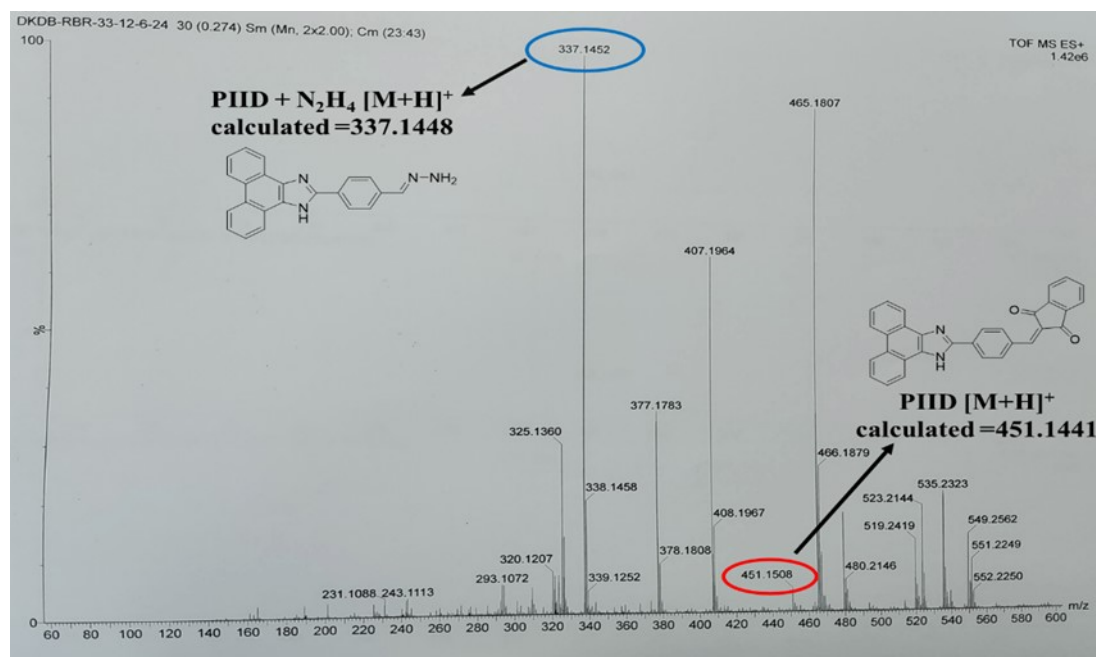

**Fig. S13** HRMS spectra were taken from the reaction mixture of the probe **PIID** and excess hydrazine.

**14. Table S2** The main vertical orbital transition of the Probe **PIID** and the resulting compounds **PIB** and **PIBH** calculated by TD-DFT method

| Molecules   | Energy (eV) | Wavelength (nm) | Osc. Strength (f) | Transition           |
|-------------|-------------|-----------------|-------------------|----------------------|
| <b>PIID</b> | 2.3383      | 530.23          | 1.1313            | <b>HOMO → LUMO</b>   |
|             | 2.9579      | 419.17          | 0.0088            | <b>HOMO → LUMO+1</b> |
|             | 2.9843      | 415.45          | 0.0134            | <b>HOMO-1 → LUMO</b> |
| <b>PIB</b>  | 2.9206      | 424.51          | 0.8236            | <b>HOMO → LUMO</b>   |
|             | 3.4844      | 355.83          | 0.0123            | <b>HOMO-1 → LUMO</b> |
|             | 3.6511      | 339.58          | 0.0001            | <b>HOMO-3 → LUMO</b> |
| <b>PIBH</b> | 3.2161      | 385.51          | 1.1030            | <b>HOMO → LUMO</b>   |
|             | 3.6363      | 340.96          | 0.0076            | <b>HOMO → LUMO+1</b> |
|             | 3.8742      | 320.03          | 0.0296            | <b>HOMO → LUMO+2</b> |



## 15. MTT assay

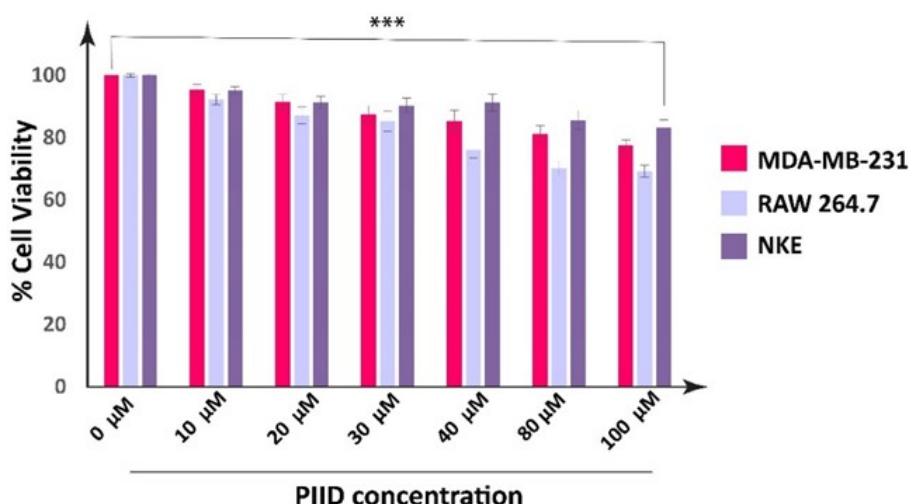

**Fig. S14** Cell survivability of MDA-MB 231, RAW 264.7, and NKE cells exposed to different concentrations of probe **PIID**. Data represent at least three independent experiments, and the bar graph shows mean  $\pm$  SEM, \*\*\* $p < 0.0001$ , were interpreted as statistically significant compared to the control.

## 16. Table S3 Environmental water sample study for $\text{ClO}^-$ detection

| Water sample       | $\text{ClO}^-$ spiked ( $\mu\text{M}$ ) | Found ( $\mu\text{M}$ ) | % Recovery | RSD (%) |
|--------------------|-----------------------------------------|-------------------------|------------|---------|
| Tap water          | 15                                      | $14.68 \pm 0.25$        | 97.86      | 1.70    |
|                    | 20                                      | $19.72 \pm 0.22$        | 98.60      | 1.12    |
| Ganges River water | 15                                      | $14.27 \pm 0.27$        | 95.13      | 1.89    |
|                    | 20                                      | $19.35 \pm 0.25$        | 96.75      | 1.29    |
| Lake Water         | 15                                      | $14.45 \pm 0.27$        | 96.33      | 1.86    |
|                    | 20                                      | $19.56 \pm 0.32$        | 97.80      | 1.64    |

## 17. Table S4 Environmental water sample study for $\text{N}_2\text{H}_4$ detection

| Water sample       | $\text{N}_2\text{H}_4$ spiked ( $\mu\text{M}$ ) | Found ( $\mu\text{M}$ ) | % Recovery | RSD (%) |
|--------------------|-------------------------------------------------|-------------------------|------------|---------|
| Tap water          | 30                                              | $29.65 \pm 0.39$        | 98.83      | 1.31    |
|                    | 40                                              | $39.72 \pm 0.42$        | 99.30      | 1.06    |
| Ganges River water | 30                                              | $28.51 \pm 0.57$        | 95.03      | 1.99    |
|                    | 40                                              | $39.18 \pm 0.65$        | 97.95      | 1.66    |
| Lake Water         | 30                                              | $29.33 \pm 0.36$        | 97.76      | 1.23    |
|                    | 40                                              | $39.30 \pm 0.45$        | 98.25      | 1.14    |

## 18. Fluorescence spectra of the probe PIID for commercial sample

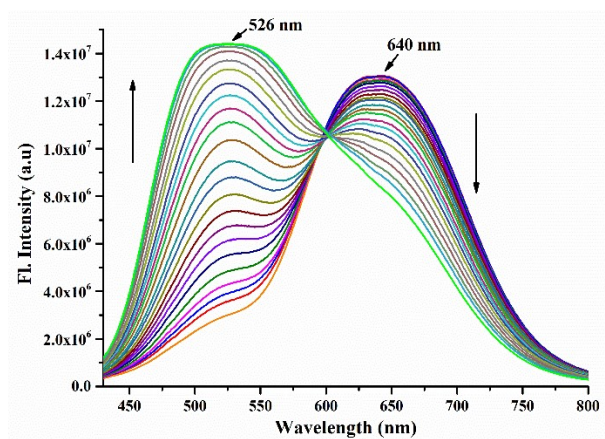

**Fig. S15** Emission spectra of **PIID** (10  $\mu\text{M}$ ) upon the addition of increasing amounts of commercial disinfectant ( $\lambda_{\text{ex}} = 420 \text{ nm}$ ).

## 19. NMR Spectra: $^1\text{H}$ -NMR, $^{13}\text{C}$ -NMR

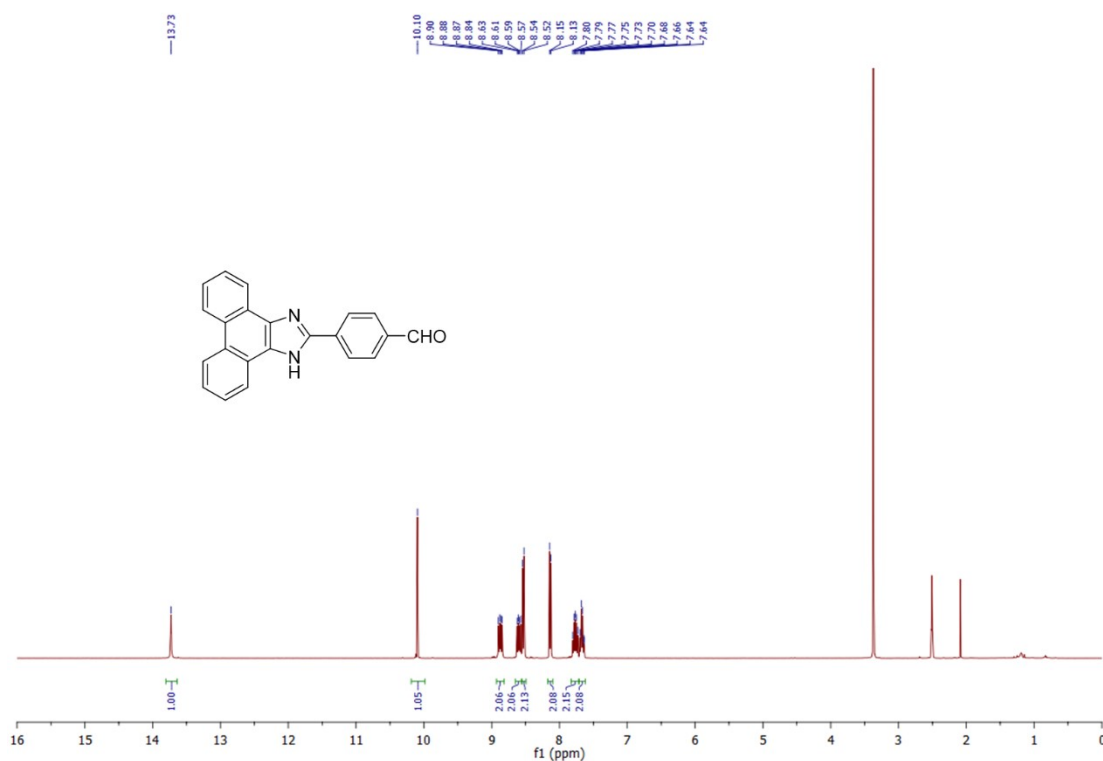

**Fig. S16**  $^1\text{H}$  NMR spectrum of the compound **PIB** in  $\text{DMSO-d}_6$

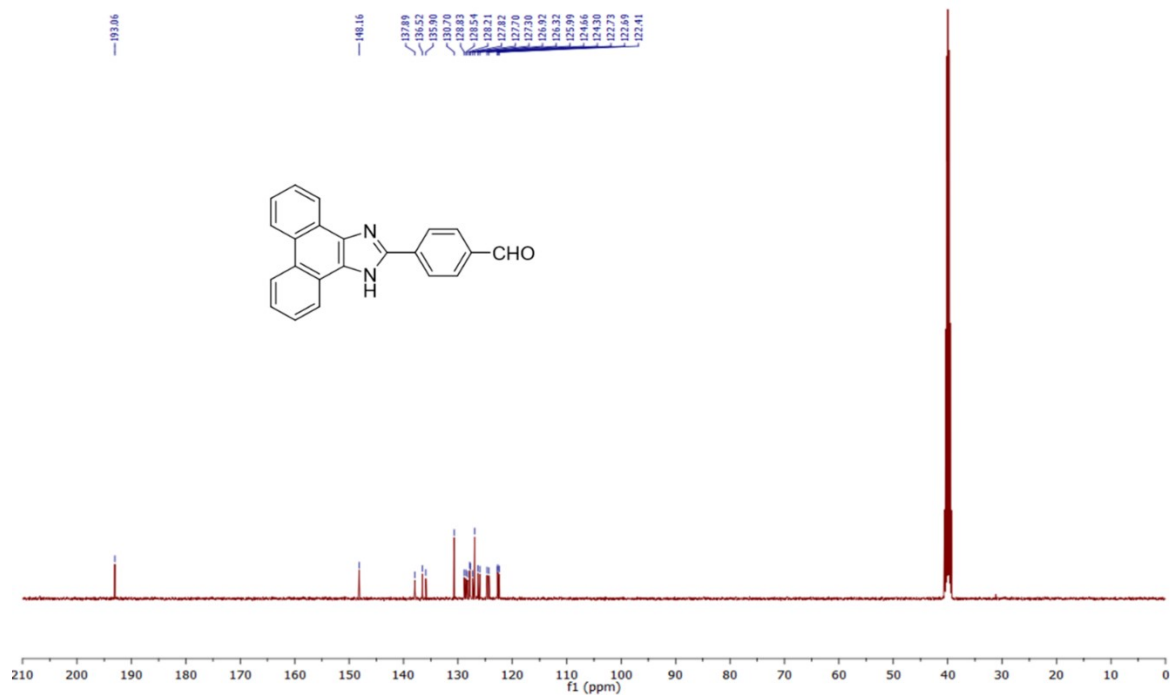

**Fig. S17** <sup>13</sup>C NMR spectrum of the compound **PIB** in DMSO-d<sub>6</sub>

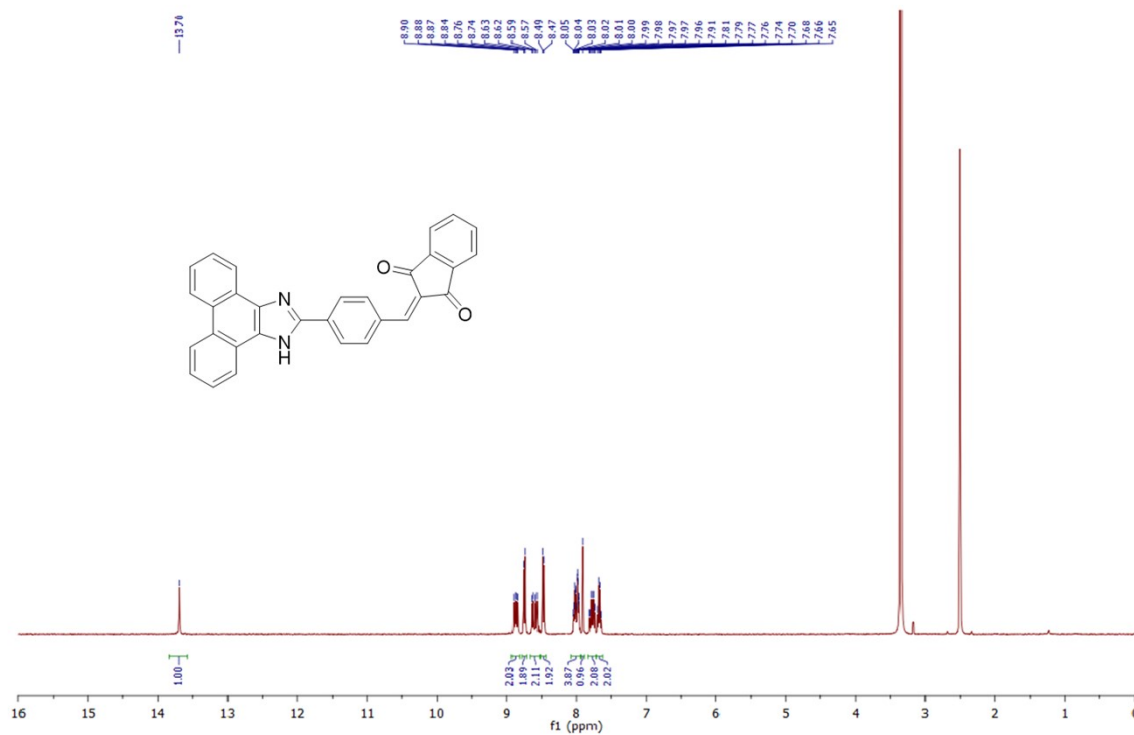

**Fig. S18** <sup>1</sup>H NMR spectrum of the compound **PIID** in DMSO-d<sub>6</sub>



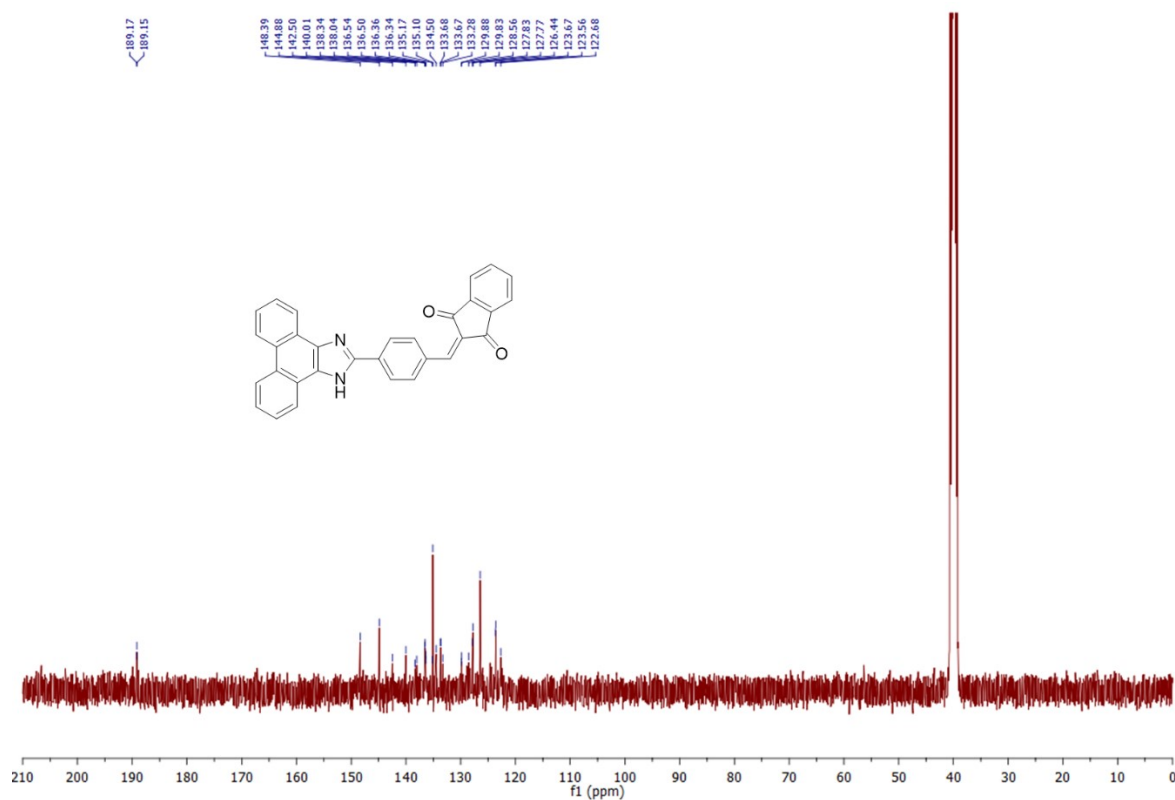

Fig. S19 <sup>13</sup>C NMR spectrum of the compound PIID in DMSO-d<sub>6</sub>

## 20. IR Spectra

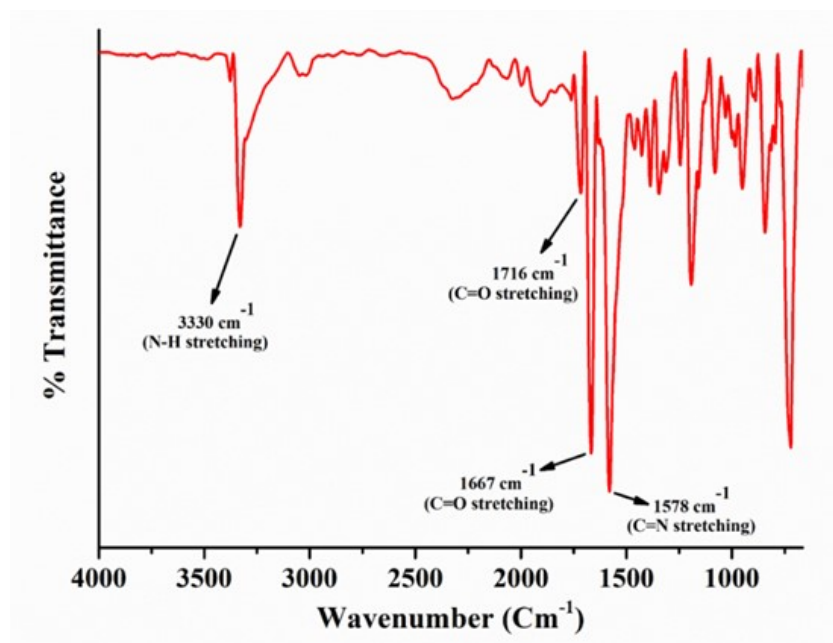

Fig. S20 The IR spectrum of the compound PIID

## 21. ESI-MS Spectra

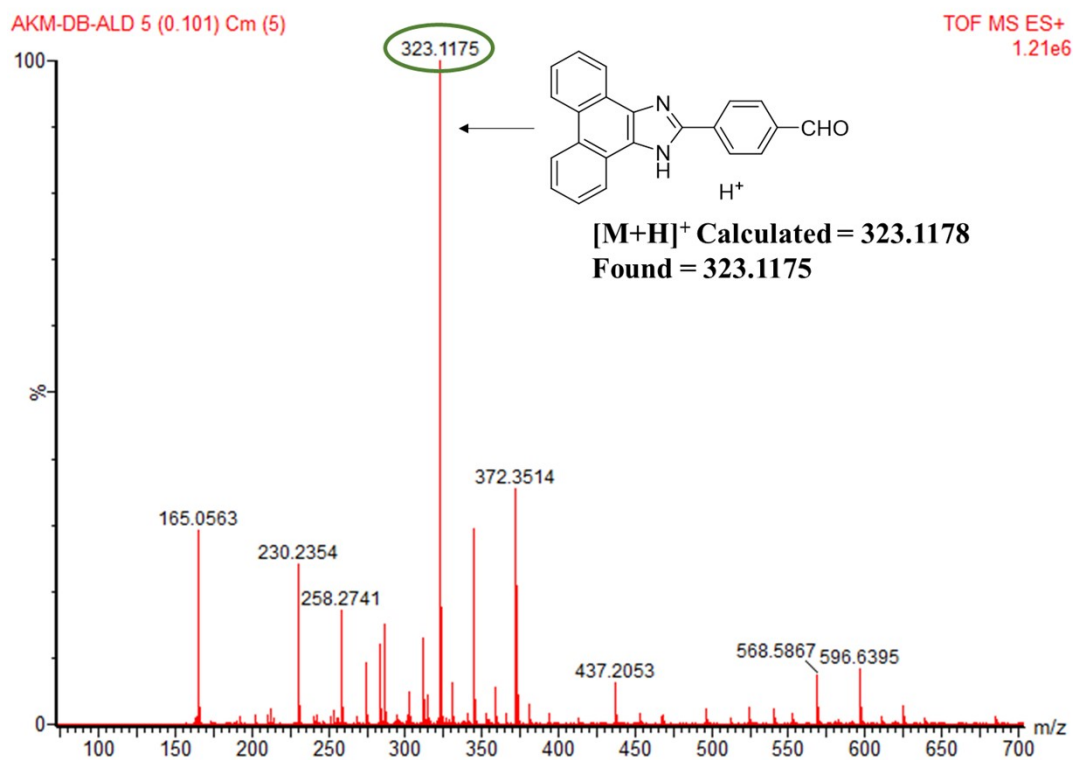

Fig. S21 HRMS spectra of the compound PIB

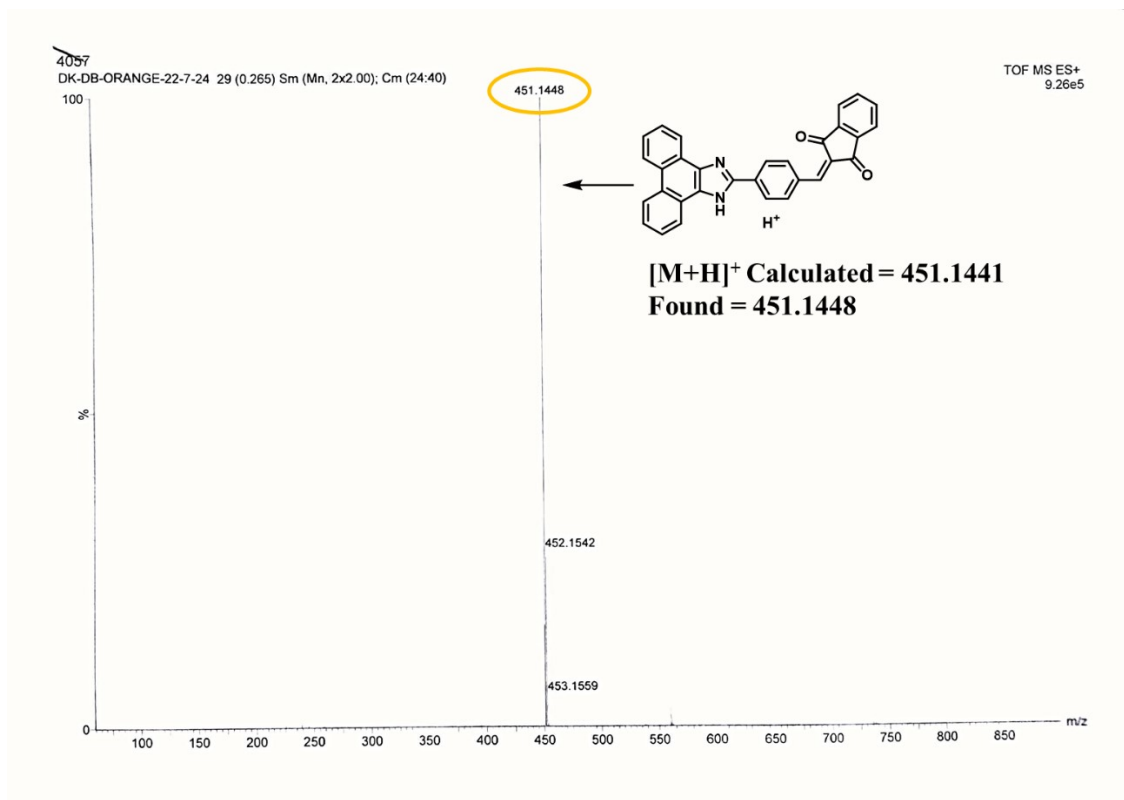

Fig. S22 HRMS spectra of the compound PIID

**22. Table S5 Comparison table of important parameters between reported hypochlorite probes with our probe PIID**

| Structure of the probe                                                             | Solvent system                                                         | Mode of sensing  | LOD          | Stoke shift/Emission shift (nm) | Response time | Applications<br>Water sample/Test strip/commercial sample | Exogenous/endogenous cell imaging | Cytotoxicity assay<br>Human cancer cell line/human epithelial cell line | Ref       |
|------------------------------------------------------------------------------------|------------------------------------------------------------------------|------------------|--------------|---------------------------------|---------------|-----------------------------------------------------------|-----------------------------------|-------------------------------------------------------------------------|-----------|
| 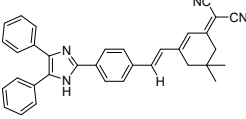   | DMSO: H <sub>2</sub> O (6:4 v/v)                                       | FL Turn-on, ICT  | 0.44 $\mu$ M | 100/-                           | -             | Yes/Yes/No                                                | Yes/No                            | No/No                                                                   | 2         |
|    | PBS buffer (10 mM, pH = 7.4) containing CTAB (1.5 mM)                  | Ratiometric      | 94 nM        | 227/170                         | 1 min         | Yes/No/No                                                 | Yes/Yes                           | Yes/No                                                                  | 3         |
|   | THF/PBS buffer (v/v = 5/5, pH = 7.4)                                   | Ratiometric, ICT | 13.2 nM      | 241/140                         | 0.5 min       | Yes/Yes/No                                                | Yes/Yes                           | Yes/No                                                                  | 4         |
|  | PBS aqueous buffer (DMSO: H <sub>2</sub> O = 9:1, 20 mM, and pH = 7.4) | FL Turn-on/ ICT  | 24 nM        | 111/-                           | 1 min         | Yes/Yes/No                                                | No/No                             | Yes/No                                                                  | 5         |
|  | DMSO/H <sub>2</sub> O (4: 6, v/v)                                      | Ratiometric, ICT | 8.74 nM      | 116/93                          | 80 sec        | Yes/Yes/Yes                                               | Yes/No                            | Yes/Yes                                                                 | 6         |
|  | PBS buffer (pH 7.4, 10 mM, containing 50% EtOH as a cosolvent)         | FL Turn-on/ PET  | 1.7 nM       | 15/-                            | Few seconds   | No/No/No                                                  | Yes/No                            | No/No                                                                   | 7         |
|  | THF/H <sub>2</sub> O solution (3:7, v/v; 10 mM PBS buffer, pH 7.4)     | Ratiometric, ICT | 32.75 nM     | 220/114                         | 40 sec        | Yes/Yes/Yes                                               | Yes/Yes                           | Yes/Yes                                                                 | This work |

**23. Table S6 Comparison table of important parameters between reported hydrazine probes with our probe PIID**

| Structure of the probe                                                              | Solvent system                                                            | Mode of sensing              | LOD           | Stoke shift/Emission shift (nm) | Response time | Applications<br>Water sample/Test strip/soil sample | Plant tissue imaging | Ref       |
|-------------------------------------------------------------------------------------|---------------------------------------------------------------------------|------------------------------|---------------|---------------------------------|---------------|-----------------------------------------------------|----------------------|-----------|
| 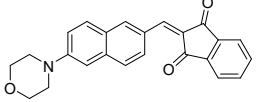   | CH <sub>3</sub> CN/PBS buffer (10.0 mM, pH = 7.4, 1/1, v/v)               | Ratiometric, ICT             | 0.5 $\mu$ M   | 200/230                         | 18 min        | No/No/No                                            | No                   | 8         |
|    | DMSO/PBS buffer (v/v, 6/4, 10.0 mM, pH:7.4)                               | Ratiometric, ESIPT, ICT      | 1.29 $\mu$ M  | 80/170                          | 2 min         | Yes/Yes/Yes                                         | Yes                  | 9         |
|   | DMSO/H <sub>2</sub> O v/v=8:2 and 1:9 pH=7.4                              | FL Turn-on or off/ AIE & ACQ | 0.137 $\mu$ M | 153/-                           | -             | No/Yes/No                                           | No                   | 10        |
|  | DMSO/H <sub>2</sub> O (6:4, v/v)                                          | Ratiometric, ICT             | 1.6 $\mu$ M   | 205/87                          | 15 min        | No/No/No                                            | No                   | 11        |
|  | DMSO/ PBS buffer solution ( v/v = 4/6,10 mmol·L <sup>-1</sup> , pH = 7.4) | FL Turn-on/ ESIPT            | 0.14 $\mu$ M  | 100/-                           | 25 min        | Yes/Yes/No                                          | No                   | 12        |
|  | H <sub>2</sub> O /DMF solution (v/v = 8/2)                                | FL Turn-on/ ICT              | 24 nM         | 74/-                            | 30 min        | Yes/No/No                                           | No                   | 13        |
|  | THF/H <sub>2</sub> O solution (4:6, v/v; 10 mM PBS buffer, pH 7.4)        | Ratiometric, ICT             | 92 nM         | 220/216                         | 90 sec        | Yes/Yes/Yes                                         | Yes                  | This work |

## 24. References

- (1) A. Dutta, S. Halder, I. Bhaumik, U. Debnath, D. Dhara, A. K. Misra, K. Jana, *ACS Pharmacol. Transl. Sci.*, 2024, **7**, 195–211.
- (2) Megha, P. Kaur, K. Singh, *Dyes Pigm.*, 2024, **228**, 112249.
- (3) L. Shi, H. Yu, X. Zeng, S. Yang, S. Gong, H. Xiang, K. Zhang, G. Shao, *New J. Chem.*, 2020, **44**, 6232.
- (4) Y. Zhang, H. Yang, M. Li, S. Gong, J. Song, Z. Wang, S. Wang, *Dyes Pigm.*, 2022, **197**, 109861.
- (5) H. Feng, Y. Wang, J. Liu, Z. Zhang, X. Yang, R. Chen, Q. Meng, R. Zhang, *J. Mater. Chem. B*, 2019, **7**, 3909.
- (6) S. Banerjee, D. Banik, S. Halder, A. Karak, P. Ghosh, K. Jana, A. K. Mahapatra, *Org. Biomol. Chem.*, 2024, **22**, 1662.
- (7) H. Lia, Y. Miaoa, Z. Liua, X. Wua, C. Piao, X. Zhou, *Dyes Pigm.*, 2020, **176**, 108192.
- (8) H. Su, J. Wang, X. Yue, B. Wang, X. Song, *Spectrochim Acta A Mol Biomol Spectrosc.*, 2022, **274**, 121096.
- (9) M. Oguza, S. Erdemira, S. Malkondu, *Anal. Chim. Acta*, 2022, **1227**, 340320.
- (10) D. Lia, L. Liua, H. Yanga, J. Maa, H. Wanga, J. Pan, *Materials Science & Engineering B*, 2022, **276**, 115556.
- (11) Z. Li, W. Zhang, C. Liu, M. Yu, H. Zhang, L. Guo, L. Wei, *Sens Actuators B Chem.*, 2017, **241**, 665-671.
- (12) A. Qin, Y. Zhang, S. Gong, M. Li, Y. Gao, X. Xu, J. Song, Z. Wang, S. Wang, *Front. Chem. Sci. Eng.*, 2023, **17**, 24–33.
- (13) X. Tian, M. Li, Y. Zhang, S. Gong, X. Wang, Z. Wang, S. Wang, *J. Photochem. Photobiol. A: Chem.*, 2023, **437**, 114467.
